# Supplementary material for: Activation of Peracetic Acid with CuFe2O4 for Rhodamine B Degradation: Activation by Cu and the Contribution of Acetylperoxyl Radicals
Source: MDPI journal article supplement (doi:10.3390/molecules27196385), 2022-09-27
Supplement: s1 [file s1]

# Supporting Information for

## Activation of Peracetic Acid with $\text{CuFe}_2\text{O}_4$ for Rhodamine B Degradation: Activation by Cu and the Contribution of Acetylperoxyl Radicals

Chengzhi Yu <sup>1</sup>, Libin Zheng <sup>1</sup>, Yongyuan Hong <sup>1</sup>, Jiabin Chen <sup>1</sup>, Feng Gao <sup>1,\*</sup>, Yalei Zhang <sup>1,2</sup>, Xuefei Zhou <sup>1,2</sup> and Libin Yang <sup>1,\*</sup>

<sup>1</sup> State Key Laboratory of Pollution Control and Resource Reuse, College of Environmental Science and Engineering, Tongji University, Shanghai 200092, China

<sup>2</sup> Shanghai Institute of Pollution Control and Ecological Security, Tongji University, Shanghai 200092, China

\* Correspondence: neuqyanglibin@126.com (L.Y.); gaofeng\_1111@126.com (F.G.)

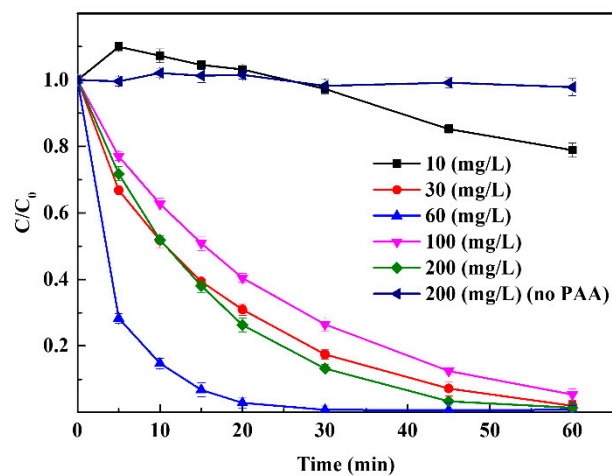

**Figure S1.** Rhodamine B degradation with and without PAA (PAA = 80 mg/L, pH = 7,  $C_0$  = 20 mg/L, room temperature for 1 h).

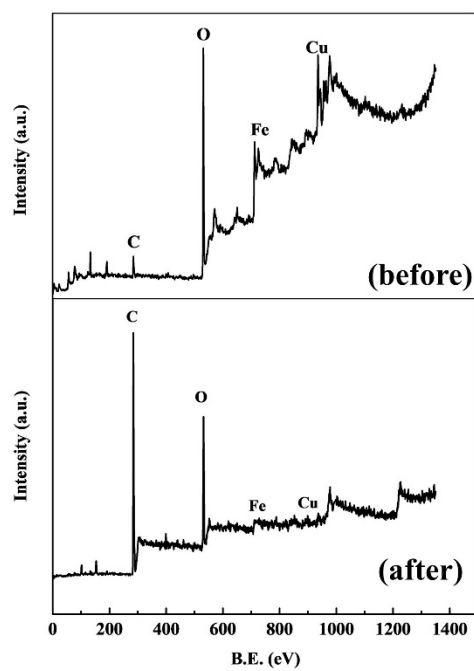

**Figure S2.** The full scale XPS spectrum of  $\text{CuFe}_2\text{O}_4$ .
